# Supplementary material for: Source Apportionment of Fine Particulate Matter during the Day and Night in Lanzhou, NW China
Source: MDPI journal article supplement (doi:10.3390/ijerph19127091), 2022-06-09
Supplement: s1 [file s1]

## Supplementary Materials

# Source Apportionment of Fine Particulate Matter during the Day and Night in Lanzhou, NW China

Mei Zhang, Jia Jia \*, Bo Wang \*, Weihong Zhang, Chenming Gu, Xiaochen Zhang

and Yuanhao Zhao

College of Geography and Environmental Sciences, Zhejiang Normal University, Jinhua 321004, China.  
zhangmei@zjnu.edu.cn (M.Z.); zhangwh@zjnu.cn (W.Z.); chenmgu@zjnu.edu.cn (C.G.);  
zhangxiaochen@zjnu.edu.cn (X.Z.); zhaoyuanhao@zjnu.edu.cn (Y.Z.)

\* Correspondence: jiaj@zjnu.edu.cn (J.J.); bowang@zjnu.edu.cn (B.W.)

## S1. PMF model

PMF is a new analytical method based on factor analysis. It decomposes a matrix of speciated sample data with multiple samples and species into two matrices: factor contributions  $G(i \times k)$  and factor profiles  $F(k \times j)$ , a residual matrix.

$$X_{ij} = \sum_{k=1}^p G_{ik} F_{kj} + E_{ij} \quad (2)$$

Here,  $X_{ij}$  is the concentration of the  $j$ th element in the  $i$ th sample,  $F_{kj}$  represents the content of the  $k$ th element in the  $j$ th source,  $G_{ik}$  represents the relative contribution of the  $k$ th source to the  $i$ th sample, and  $E_{ij}$  represents the residual between the measured mass concentration of the  $ij$ th sample and its analytical value, and  $p$  is the number of sources.

PMF defines the sum of sample residuals  $E_{ij}$  and the input uncertainty  $u_{ij}$  as objective function  $Q$ , and the minimization of objective function  $Q$  is the optimal solution of the model:

$$Q = \sum_{i=1}^n \sum_{j=1}^m \left[ \frac{X_{ij} - \sum_{k=1}^p G_{ik} F_{kj}}{u_{ij}} \right] \quad (3)$$

Where  $u_{ij}$  is the “uncertainty” of the  $j$ th element in the  $i$ th sample.

The EPA PMF 5.0 model was used for source apportionment of PM<sub>2.5</sub> in Lanzhou. There were four data sets: the data of day and night in winter and summer respectively. Every data set was run numerous times to determine the range within which the objective function  $Q$ -values remained

approximately constant. Five to seven factors were run with different F-peak values to determine the optimal number of source factors, and a final six factors solution were the optimal solutions for daytime and nighttime during winter and summer respectively.

The model can weight each individual data point and give each data point a suitable amount of uncertainty. When the element concentration is lower than or equal to the corresponding method detection limit (MDL), the uncertainty calculation formula is:

$$U_{ij} = 5/6 \times MDL \quad (4)$$

Otherwise, the calculation formula is:

$$U_{ij} = \sqrt{(errorfraction \times c)^2 + MDL^2} \quad (5)$$

where the error fraction is the relative standard deviation, C is the concentration of the chemical element, and MDL is the method detection limit.

### S1.1 PMF source apportionment during winter daytime

There we using concentrations of PM<sub>2.5</sub>, Na<sup>+</sup>, NH<sub>4</sub><sup>+</sup>, K<sup>+</sup>, Mg<sup>2+</sup>, Ca<sup>2+</sup>, Cl<sup>-</sup>, NO<sub>3</sub><sup>-</sup>, SO<sub>4</sub><sup>2-</sup>, OC, EC, Ca, Fe, K, Ti, Ba, Mn, Sr, Cd, Se, Pb, Cu, Zn, As, Ni, Co, Cr and V species in the 50 total samples. The species PM<sub>2.5</sub> were clarified as “total variable”, The species OC, EC, Cl<sup>-</sup>, NO<sub>3</sub><sup>-</sup>, SO<sub>4</sub><sup>2-</sup>, Na<sup>+</sup>, NH<sub>4</sub><sup>+</sup>, K<sup>+</sup>, Ca, Ti, V, Mn, Fe, Co, Sr, Ba, Pb, Ni, Cu and As were clarified as “strong variables”; The species Mg<sup>2+</sup> and Ca<sup>2+</sup> were clarified as “weak variables”; The species K, Cr and Se were clarified as “bad variables”.

**Table S1** Summary of PMF and error estimation diagnostics during winter daytime.

| Diagnostic                                 | 3 factor  | 4 factor  | 5 factor | 6factor  |
|--------------------------------------------|-----------|-----------|----------|----------|
| Q <sub>robust</sub>                        | 9181.76   | 6726.9    | 5354.6   | 4616.33  |
| Q <sub>true</sub>                          | 13307.7   | 8944.1    | 6833.62  | 5603.61  |
| Q <sub>robust</sub> /Q <sub>expected</sub> | 15.208800 | 11.180062 | 9.425683 | 8.620938 |
| DISP% dQ                                   | <0.1%     | <0.1%     | <0.1%    | <0.1%    |
| DISP swaps                                 | 0         | 0         | 0        | 0        |

  

| BS Mapping | Salt lake | Coal combustion | Vehicle emission | SNA | Soil dust | Industry | Unmapped |
|------------|-----------|-----------------|------------------|-----|-----------|----------|----------|
| Factor 1   | 84        | 1               | 0                | 1   | 4         | 2        | 0        |
| Factor 2   | 5         | 68              | 2                | 3   | 8         | 6        | 0        |

|          |    |   |    |    |    |    |   |
|----------|----|---|----|----|----|----|---|
| Factor 3 | 1  | 2 | 73 | 1  | 12 | 3  | 0 |
| Factor 4 | 11 | 0 | 0  | 60 | 16 | 3  | 0 |
| Factor 5 | 1  | 0 | 0  | 0  | 90 | 1  | 0 |
| Factor 6 | 0  | 1 | 0  | 6  | 3  | 86 | 2 |

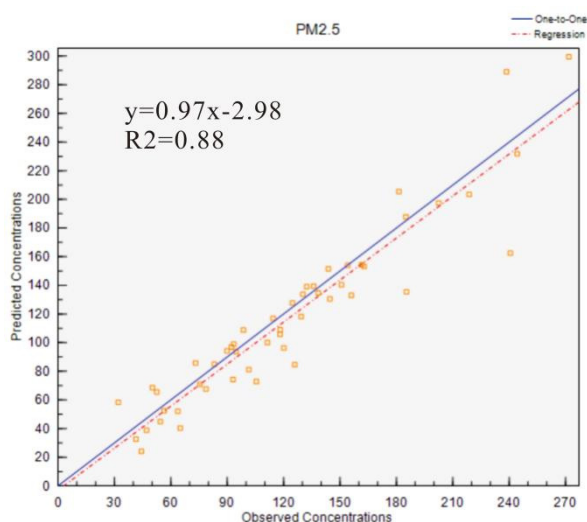

**Figure S1** Plot of predicted mass results from the PMF model against observed mass results of PM<sub>2.5</sub> during winter daytime.

### S1.2 PMF source apportionment during winter nighttime

There we using concentrations of PM<sub>2.5</sub>, Na<sup>+</sup>, NH<sub>4</sub><sup>+</sup>, K<sup>+</sup>, Mg<sup>2+</sup>, Ca<sup>2+</sup>, Cl<sup>-</sup>, NO<sub>3</sub><sup>-</sup>, SO<sub>4</sub><sup>2-</sup>, OC, EC Ca, Fe, K, Ti, Ba, Mn, Sr, Cd, Se, Pb, Cu, Zn, As, Ni, Co, Cr and V species in the 49 total samples. The species PM<sub>2.5</sub> were clarified as “total variable”, The species OC, EC, Cl<sup>-</sup>, NO<sub>3</sub><sup>-</sup>, SO<sub>4</sub><sup>2-</sup>, Na<sup>+</sup>, NH<sub>4</sub><sup>+</sup>, Mg<sup>2+</sup>, Ca<sup>2+</sup>, Ca, Ti, V, Cr, Mn, Fe, Co, Zn, As, Se, Cd and Pb were clarified as “strong variables”; The species K<sup>+</sup>, Ni, Cu and K were clarified as “weak variables”; The species Sr and Ba were clarified as “bad variables”.

**Table S2** Summary of PMF and error estimation diagnostics during winter nighttime.

| Diagnostic                                 | 3 factor    | 4 factor  | 5 factor    | 6factor  |
|--------------------------------------------|-------------|-----------|-------------|----------|
| Q <sub>robust</sub>                        | 10696.3     | 8117.09   | 6240.7      | 4755.91  |
| Q <sub>true</sub>                          | 5993.5      | 12744.8   | 7755        | 5616.71  |
| Q <sub>robust</sub> /Q <sub>expected</sub> | 18.74970627 | 17.482578 | 11.85779858 | 9.700708 |
| DISP% dQ                                   | <0.1%       | <0.1%     | <0.1%       | <0.1%    |
| DISP swaps                                 | 0           | 0         | 0           | 0        |

| <b>BS Mapping</b> | Salt lake | Coal combustion | Vehicle emission | SNA | Soil dust | Industry | Unmapped |
|-------------------|-----------|-----------------|------------------|-----|-----------|----------|----------|
| Factor 1          | 82        | 0               | 0                | 0   | 0         | 0        | 18       |
| Factor 2          | 0         | 82              | 0                | 0   | 0         | 0        | 18       |
| Factor 3          | 0         | 0               | 80               | 2   | 0         | 0        | 18       |
| Factor 4          | 0         | 2               | 0                | 80  | 0         | 0        | 18       |
| Factor 5          | 0         | 0               | 0                | 0   | 82        | 0        | 18       |
| Factor 6          | 0         | 0               | 0                | 0   | 0         | 82       | 18       |

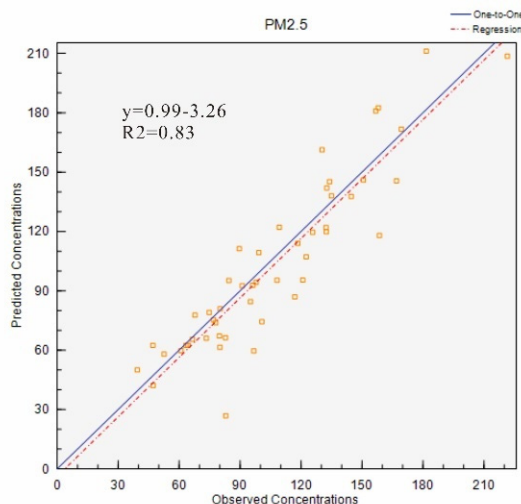

**Figure S2** Plot of predicted mass results from the PMF model against observed mass results of PM<sub>2.5</sub> during winter nighttime.

### S1.3 PMF source apportionment during summer daytime

There we using concentrations of PM<sub>2.5</sub>, Na<sup>+</sup>, NH<sub>4</sub><sup>+</sup>, K<sup>+</sup>, Mg<sup>2+</sup>, Ca<sup>2+</sup>, Cl<sup>-</sup>, NO<sub>3</sub><sup>-</sup>, SO<sub>4</sub><sup>2-</sup>, OC, EC, Ca, Fe, K, Ti, Ba, Mn, Sr, Cd, Se, Pb, Cu, Zn, As, Ni, Co, Cr and V species in the 30 total samples. The species PM<sub>2.5</sub> were clarified as “total variable”, The species OC, EC, Cl<sup>-</sup>, SO<sub>4</sub><sup>2-</sup>, Na<sup>+</sup>, NH<sub>4</sub><sup>+</sup>, K<sup>+</sup>, Mg<sup>2+</sup>, Ca, Ti, Mn, Fe, Co, Ni, Cu, As, Sr, Ba, were clarified as “strong variables”; The species V, Cr, Se, Zn, Cd and K were clarified as “weak variables”; The species NO<sub>3</sub><sup>-</sup>, Ca<sup>2+</sup> and Pb were clarified as “bad variables”.

**Table S3** Summary of PMF and error estimation diagnostics during summer daytime.

| Diagnostic                                 | 3 factor    | 4 factor  | 5 factor  | 6 factor |
|--------------------------------------------|-------------|-----------|-----------|----------|
| Q <sub>robust</sub>                        | 4434.63     | 3091.8    | 2411.54   | 1770.02  |
| Q <sub>true</sub>                          | 6675.4      | 4022.8    | 2869.54   | 1976.14  |
| Q <sub>robust</sub> /Q <sub>expected</sub> | 20.22848511 | 16.027011 | 12.697079 | 11.35713 |
| DISP% dQ                                   | <0.1%       | <0.1%     | <0.1%     | <0.1%    |

|            |   |   |   |   |
|------------|---|---|---|---|
| DISP swaps | 0 | 0 | 0 | 0 |
|------------|---|---|---|---|

| BS Mapping | Salt lake | Coal combustion | Vehicle emission | SNA | Soil dust | Industry | Unmapped |
|------------|-----------|-----------------|------------------|-----|-----------|----------|----------|
| Factor 1   | 99        | 0               | 1                | 0   | 0         | 0        | 0        |
| Factor 2   | 2         | 92              | 0                | 0   | 0         | 5        | 1        |
| Factor 3   | 12        | 0               | 86               | 0   | 0         | 2        | 0        |
| Factor 4   | 0         | 0               | 0                | 100 | 0         | 0        | 0        |
| Factor 5   | 11        | 0               | 5                | 1   | 59        | 3        | 21       |
| Factor 6   | 0         | 0               | 0                | 0   | 0         | 100      | 0        |

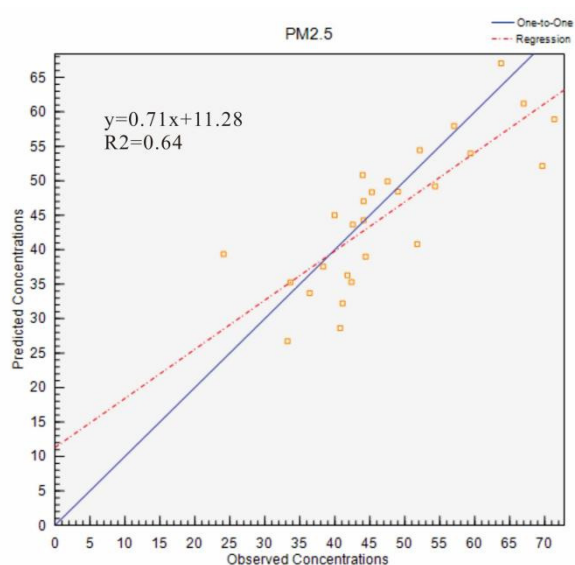

**Figure S3** Plot of predicted mass results from the PMF model against observed mass results of PM<sub>2.5</sub> during summer daytime.

#### S1.4 PMF source apportionment during summer nighttime

There we using concentrations of PM<sub>2.5</sub>, Na<sup>+</sup>, NH<sub>4</sub><sup>+</sup>, K<sup>+</sup>, Mg<sup>2+</sup>, Ca<sup>2+</sup>, Cl<sup>-</sup>, NO<sub>3</sub><sup>-</sup>, SO<sub>4</sub><sup>2-</sup>, OC, EC, Ca, Fe, K, Ti, Ba, Mn, Sr, Cd, Se, Pb, Cu, Zn, As, Ni, Co, Cr and V species in the 30 total samples. The species PM<sub>2.5</sub> were clarified as “total variable”, The species NH<sub>4</sub><sup>+</sup>, NO<sub>3</sub><sup>-</sup>, OC, EC, SO<sub>4</sub><sup>2-</sup>, K<sup>+</sup>, Ti, Mn, Fe, Co, Ni, Cu, Zn, As, Sr, Ba, were clarified as “strong variables”; The species Pb, K, Se, V, Cr, Cl<sup>-</sup>, Na<sup>+</sup>, Ca<sup>2+</sup>, Ca and Cd were clarified as “weak variables”; The species Mg<sup>2+</sup> was clarified as “bad variables”.

**Table S4** Summary of PMF and error estimation diagnostics during summer nighttime.

| Diagnostic                              | 3 factor    | 4 factor  | 5 factor  | 6factor  |
|-----------------------------------------|-------------|-----------|-----------|----------|
| $Q_{\text{robust}}$                     | 4624        | 3591.4    | 2644.9    | 2005.6   |
| $Q_{\text{true}}$                       | 7228        | 5090.2    | 3506.4    | 2300.97  |
| $Q_{\text{robust}}/Q_{\text{expected}}$ | 23.09249115 | 17.482578 | 16.308837 | 13.86127 |
| DISP% dQ                                | <0.1%       | <0.1%     | <0.1%     | <0.1%    |
| DISP swaps                              | 0           | 0         | 0         | 0        |

| BS<br>Mapping | Salt lake | Coal<br>combustion | Vehicle<br>emission | SNA | Soil dust | Industry | Unmapped |
|---------------|-----------|--------------------|---------------------|-----|-----------|----------|----------|
| Factor 1      | 59        | 3                  | 2                   | 3   | 11        | 6        | 2        |
| Factor 2      | 1         | 81                 | 0                   | 2   | 2         | 0        | 0        |
| Factor 3      | 0         | 1                  | 79                  | 2   | 1         | 1        | 2        |
| Factor 4      | 5         | 1                  | 0                   | 71  | 5         | 1        | 3        |
| Factor 5      | 1         | 1                  | 0                   | 1   | 76        | 4        | 3        |
| Factor 6      | 0         | 1                  | 0                   | 0   | 3         | 81       | 1        |

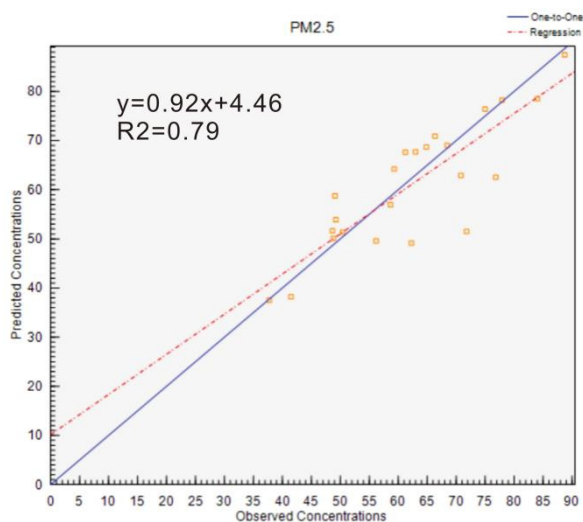

**Figure S4** Plot of predicted mass results from the PMF model against observed mass results of  $PM_{2.5}$  during summer nighttime.
